# Supplementary material for: High-resolution line-scan Brillouin microscopy for live imaging of mechanical properties during embryo development
Source: PubMed Central journal article supplement (PMC10172129; doi:10.1038/s41592-023-01822-1), 2023-03-30
Supplement: 41592_2023_1822_MOESM2_ESM.pdf [file 41592_2023_1822_MOESM2_ESM.pdf]

## Reporting Summary

Nature Research wishes to improve the reproducibility of the work that we publish. This form provides structure for consistency and transparency in reporting. For further information on Nature Research policies, see [Authors & Referees](#) and the [Editorial Policy Checklist](#).

### Statistical parameters

When statistical analyses are reported, confirm that the following items are present in the relevant location (e.g. figure legend, table legend, main text, or Methods section).

n/a Confirmed

- The exact sample size ( $n$ ) for each experimental group/condition, given as a discrete number and unit of measurement
- An indication of whether measurements were taken from distinct samples or whether the same sample was measured repeatedly
- The statistical test(s) used AND whether they are one- or two-sided  
*Only common tests should be described solely by name; describe more complex techniques in the Methods section.*
- A description of all covariates tested
- A description of any assumptions or corrections, such as tests of normality and adjustment for multiple comparisons
- A full description of the statistics including central tendency (e.g. means) or other basic estimates (e.g. regression coefficient) AND variation (e.g. standard deviation) or associated estimates of uncertainty (e.g. confidence intervals)
- For null hypothesis testing, the test statistic (e.g.  $F$ ,  $t$ ,  $r$ ) with confidence intervals, effect sizes, degrees of freedom and  $P$  value noted  
*Give  $P$  values as exact values whenever suitable.*
- For Bayesian analysis, information on the choice of priors and Markov chain Monte Carlo settings
- For hierarchical and complex designs, identification of the appropriate level for tests and full reporting of outcomes
- Estimates of effect sizes (e.g. Cohen's  $d$ , Pearson's  $r$ ), indicating how they were calculated
- Clearly defined error bars  
*State explicitly what error bars represent (e.g. SD, SE, CI)*

*Our web collection on [statistics for biologists](#) may be useful.*

### Software and code

Policy information about [availability of computer code](#)

Data collection

Custom written LabView 2018 control software as well as Arduino 1.8.13 code.

Data analysis

Custom written Matlab 2018a,b scripts, CUDA 11.5 code (see <https://github.com/prevedel-lab/brillouin-gpu-acceleration>), Fiji 1.52i, Prism Graphpad 8-9

For manuscripts utilizing custom algorithms or software that are central to the research but not yet described in published literature, software must be made available to editors/reviewers upon request. We strongly encourage code deposition in a community repository (e.g. GitHub). See the Nature Research [guidelines for submitting code & software](#) for further information.

### Data

Policy information about [availability of data](#)

All manuscripts must include a [data availability statement](#). This statement should provide the following information, where applicable:

- Accession codes, unique identifiers, or web links for publicly available datasets
- A list of figures that have associated raw data
- A description of any restrictions on data availability

The raw datasets generated and/or analysed for this work are available at <https://doi.org/10.5281/zenodo.7525851>.

## Field-specific reporting

Please select the best fit for your research. If you are not sure, read the appropriate sections before making your selection.

Life sciences  Behavioural & social sciences  Ecological, evolutionary & environmental sciences

For a reference copy of the document with all sections, see [nature.com/authors/policies/ReportingSummary-flat.pdf](https://www.nature.com/authors/policies/ReportingSummary-flat.pdf)

## Life sciences study design

All studies must disclose on these points even when the disclosure is negative.

|                 |                                                                                                                                                                                                                                                                                                                                                                                                                                                                                                                                                                                                                                                                                                                    |
|-----------------|--------------------------------------------------------------------------------------------------------------------------------------------------------------------------------------------------------------------------------------------------------------------------------------------------------------------------------------------------------------------------------------------------------------------------------------------------------------------------------------------------------------------------------------------------------------------------------------------------------------------------------------------------------------------------------------------------------------------|
| Sample size     | This work focused on the development of a new imaging technique. The performance of the microscope was validated on imaging sub-diffraction (fluorescent) beads as well as live <i>Drosophila</i> and <i>Phallusia</i> embryos. The sample size was 64 which is the number of total imaging sessions and recordings, and was not based on any sample size calculation. In general, the imaging was repeated between 4 to 50 times on each organism, all of which produced comparable data quality. These numbers are indicated in the main text and below. This sample size was sufficient in our opinion since we were demonstrating a microscope's performance and were not investigating a biological question. |
| Data exclusions | No data was intentionally excluded from the study. Representative data sets were chosen for the Figures.                                                                                                                                                                                                                                                                                                                                                                                                                                                                                                                                                                                                           |
| Replication     | We repeated the in-vivo imaging experiments multiple times on a total of n=10 individual <i>Drosophila</i> and n= 60 <i>Phallusia</i> embryos and n=4 mouse embryos. The results were reproducible, i.e. they yielded image datasets of comparable quality.                                                                                                                                                                                                                                                                                                                                                                                                                                                        |
| Randomization   | No randomization was applied as this was not essential for our study which concerned the demonstration of a new microscopy technique.                                                                                                                                                                                                                                                                                                                                                                                                                                                                                                                                                                              |
| Blinding        | In principle we were blinded to any group allocation and the outcome of our study, i.e. the demonstration of a new microscopy technique, is independent of the biological sample studied.                                                                                                                                                                                                                                                                                                                                                                                                                                                                                                                          |

## Reporting for specific materials, systems and methods

### Materials & experimental systems

|                                     |                                                                 |
|-------------------------------------|-----------------------------------------------------------------|
| n/a                                 | Involved in the study                                           |
| <input checked="" type="checkbox"/> | <input type="checkbox"/> Unique biological materials            |
| <input type="checkbox"/>            | <input checked="" type="checkbox"/> Antibodies                  |
| <input checked="" type="checkbox"/> | <input type="checkbox"/> Eukaryotic cell lines                  |
| <input checked="" type="checkbox"/> | <input type="checkbox"/> Palaeontology                          |
| <input type="checkbox"/>            | <input checked="" type="checkbox"/> Animals and other organisms |
| <input checked="" type="checkbox"/> | <input type="checkbox"/> Human research participants            |

### Methods

|                                     |                                                 |
|-------------------------------------|-------------------------------------------------|
| n/a                                 | Involved in the study                           |
| <input checked="" type="checkbox"/> | <input type="checkbox"/> ChIP-seq               |
| <input checked="" type="checkbox"/> | <input type="checkbox"/> Flow cytometry         |
| <input checked="" type="checkbox"/> | <input type="checkbox"/> MRI-based neuroimaging |

## Antibodies

|                 |                                                                                                                                                                                                                                                                                                                                                                                                                                                                                                                                                                                                                                                                                                                           |
|-----------------|---------------------------------------------------------------------------------------------------------------------------------------------------------------------------------------------------------------------------------------------------------------------------------------------------------------------------------------------------------------------------------------------------------------------------------------------------------------------------------------------------------------------------------------------------------------------------------------------------------------------------------------------------------------------------------------------------------------------------|
| Antibodies used | For <i>Drosophila</i> embryos: Anti Snail (rabbit) antibody against aminoacids 1-200 of Snail Protein, anti <i>Drosophila</i> Discs Large (DSHB, mouse, 4F3) and anti mCherry (Abcam rabbit, ab167453)<br><br>For mouse embryos: Primary antibodies against CDX2 (Biogenex, NC9471689; 1:150), SOX2 (Sigma, SAB3500187; 1:50) were used in this study. For the secondary staining, antibodies targeting mouse immunoglobulin coupled to Alexa Fluor 488 (Life Technologies, A21202), Alexa Fluor 555 (Life Technologies, A31570), rabbit immunoglobulin-coupled Alexa Fluor 546 (Invitrogen, A10040) were used. Finally, Alexa Fluor 633-coupled Phalloidin (Invitrogen, R415; 1:50) was used to stain filamentous Actin. |
| Validation      | Snail: The antibody raised against the Snail-GST protein was characterised through immunostainings, immunoprecipitation and Western blot analysis. Snail validation information is available upon request.<br>Validation information about all commercial antibodies can be accessed on the corresponding supplier's websites.                                                                                                                                                                                                                                                                                                                                                                                            |

## Animals and other organisms

Policy information about [studies involving animals](#); [ARRIVE guidelines](#) recommended for reporting animal research

|                    |                                                                                                                                                                                                                                                                                                                                                                         |
|--------------------|-------------------------------------------------------------------------------------------------------------------------------------------------------------------------------------------------------------------------------------------------------------------------------------------------------------------------------------------------------------------------|
| Laboratory animals | This work followed the European Communities Council Directive (2010/63/EU) to minimize animal pain and discomfort. All procedures described in this manuscript were approved by EMBL's committee for animal welfare and institutional animal care and use (IACUC), under protocol number 2020-01-06RP. (C57BL/6xC3H) F1 mice from eight-weeks of age onwards were used. |
|--------------------|-------------------------------------------------------------------------------------------------------------------------------------------------------------------------------------------------------------------------------------------------------------------------------------------------------------------------------------------------------------------------|

Embryos were recovered from superovulated female mice mated with male mice. Drosophila are invertebrate organisms and thus do not require ethics oversight.

Wild animals

Adult wild *Phallusia mammillata* were collected by the Roscoff Marine Biological Station (France) in the coast of Brittany. The *Phallusia* were shipped from Roscoff to Heidelberg where they were maintained in an aquarium until used. The gametes were surgically collected for in vitro fertilisation and the sacrificed *Phallusia* killed by freezing. *Phallusia* are invertebrate organisms and thus do not require ethics oversight.

Field-collected samples

The study did not involve field-collected samples.
